# Supplementary material for: Inhibition of Kelch-like epichlorohydrin-related protein 1 promotes the progression and drug resistance of lung adenocarcinoma
Source: PeerJ journal article supplement (doi:10.7717/peerj.11908), 2021-08-19
Supplement: Figure3_raw_data.zip [file 20200919cell growth curve-24h.xls]

## Sheet: Sheet1
Sample ID	UserID	Viable cell concentration	Total cell concentration	Cell viability	Dead cell concentration	Total cell number	Number of living cells	Number of dead cells	The average diameter	Average roundness	Clumping rate	Dilution ratio	Measure time	Cell type
vc-A-1	user	13000	13000	100	0	7	7	0	17.55	0.91	10.52	Original concentration	44093.8	Std_Size
vc-A-2	user	12600	12600	100	0	11	11	0	18.03	0.88	25.9	Original concentration	44093.8	Std_Size
vc-A-3	user	12400	12440	99.64	40	11	10	0	18.79	0.92	16.2	Original concentration	44093.8	Std_Size
KEAP1-OE-A-1	user	11300	11300	100	0	9	9	0	19.41	0.78	0	Original concentration	44093.8	Std_Size
KEAP1-OE-A-2	user	12000	12000	100	0	10	10	0	18.28	0.81	0	Original concentration	44093.8	Std_Size
KEAP1-OE-A-3	user	11400	11890	95.87	490	10	9	1	18.8	0.82	0	Original concentration	44093.8	Std_Size
KEAP1-SH-A-1	user	14900	15250	97.67	350	12	11	1	18.37	0.82	10.53	Original concentration	44093.8	Std_Size
KEAP1-SH-A-2	user	13800	13800	100	0	12	12	0	17.14	0.62	11.6	Original concentration	44093.8	Std_Size
KEAP1-SH-A-3	user	14500	14840	97.65	340	12	11	1	17.78	0.72	16.6	Original concentration	44093.8	Std_Size
VC-H-1	user	15600	15600	100	0	13	13	0	20.13	0.85	12.5	Original concentration	44093.8	Std_Size
VC-H-2	user	17700	17740	96.78	40	14	13	0	20.57	0.75	11.11	Original concentration	44093.8	Std_Size
VC-H-3	user	13700	13700	100	0	12	12	0	23.76	0.87	12.23	Original concentration	44093.8	Std_Size
KEAP1-OE-H-1	user	13800	14120	97.72	320	12	11	1	19.07	0.83	10.34	Original concentration	44093.8	Std_Size
KEAP1-OE-H-2	user	15600	15600	100	0	14	14	0	19.8	0.78	9.76	Original concentration	44093.8	Std_Size
KEAP1-OE-H-3	user	14000	14490	96.56	490	12	11	1	20.67	0.88	0	Original concentration	44093.8	Std_Size
KEAP1-SH-H-1	user	18900	18900	100	0	14	14	0	20.88	0.77	33.33	Original concentration	44093.8	Std_Size
KEAP1-SH-H-2	user	17800	17800	100	0	14	14	0	20.47	0.74	6.25	Original concentration	44093.8	Std_Size
KEAP1-SH-H-3	user	19900	19940	99.78	40	15	14	1	21.35	0.79	3.76	Original concentration	44093.8	Std_Size
Attention :VC-A is Ctrl,A549
OE-A is OE A549
SH-A is KD A549
VC-H is Ctrl,H1299
OE-H is OE h1299
SH-H is KD H1299
