# Supplementary material for: Inhibition of Kelch-like epichlorohydrin-related protein 1 promotes the progression and drug resistance of lung adenocarcinoma
Source: PeerJ journal article supplement (doi:10.7717/peerj.11908), 2021-08-19
Supplement: Figure3_raw_data.zip [file 20200920Growth curve-48h.xls]

## Sheet: Sheet1
Sample ID	UserID	Viable cell concentration	Total cell concentration	Cell viability	Dead cell concentration	Total cell number	Number of living cells	Number of dead cells	The average diameter	Average roundness	Clumping rate	Dilution ratio	Measure time	Cell type
VC-A549-1	user	27200	27200	100	0	22	22	0	17.57	0.75	25.37	Original concentration	44094.9	Std_Size
VC-A549-2	user	27300	27340	99.87	40	23	22	1	17.23	0.85	8.57	Original concentration	44094.9	Std_Size
VC-A549-3	user	28000	28410	98.54	410	23	22	1	17.34	0.89	9.72	Original concentration	44094.9	Std_Size
OE-keap1-A549-1	user	24700	25370	97.34	670	21	20	1	18.99	0.81	12.5	Original concentration	44094.9	Std_Size
OE-keap1-A549-2	user	23400	23400	100	0	21	21	0	19.16	0.81	3.7	Original concentration	44094.9	Std_Size
OE-keap1-A549-3	user	22700	22700	100	0	21	21	0	19.23	0.87	9.4	Original concentration	44094.9	Std_Size
SH-keap1-A549-1	user	29000	29560	98.11	560	24	23	1	18.91	0.8	0	Original concentration	44094.9	Std_Size
SH-keap1-A549-2	user	30300	31290	96.83	990	24	23	1	18.13	0.82	3.17	Original concentration	44094.9	Std_Size
SH-keap1-A549-3	user	32300	32300	100	0	25	25	0	18.56	0.78	2.18	Original concentration	44094.9	Std_Size
SH-keap1-H1299-1	user	34600	35540	97.36	940	27	26	1	20.58	0.8	7.5	Original concentration	44094.9	Std_Size
SH-keap1-H1299-2	user	30700	32260	95.16	1560	25	23	2	21.64	0.79	3.23	Original concentration	44094.9	Std_Size
SH-keap1-H1299-3	user	36700	38570	96.76	1870	29	27	2	25.54	0.78	3.23	Original concentration	44094.9	Std_Size
VC-keap1-H1299-1	user	32700	32880	99.45	180	24	23	1	21.45	0.56	15.38	Original concentration	44094.9	Std_Size
VC-keap1-H1299-2	user	28700	29230	98.18	530	24	23	1	20.92	0.74	10.64	Original concentration	44094.9	Std_Size
VC-keap1-H1299-3	user	26900	26900	100	0	22	22	0	20.67	0.89	8.9	Original concentration	44094.9	Std_Size
OE-keap1-H1299-1	user	28600	28600	100	0	24	24	0	20.02	0.8	3.03	Original concentration	44094.9	Std_Size
OE-keap1-H1299-2	user	20500	20500	100	0	19	18	0	20.29	0.8	3.57	Original concentration	44094.9	Std_Size
OE-keap1-H1299-3	user	24500	24670	99.93	170	23	22	2	19.76	0.6	3.67	Original concentration	44094.9	Std_Size
