# Supplementary material for: Inhibition of Kelch-like epichlorohydrin-related protein 1 promotes the progression and drug resistance of lung adenocarcinoma
Source: PeerJ journal article supplement (doi:10.7717/peerj.11908), 2021-08-19
Supplement: Figure3_raw_data.zip [file 20200921Growth curve-72h.xls]

## Sheet: Sheet1
Sample ID	UserID	Viable cell concentration	Total cell concentration	Cell viability	Dead cell concentration	Total cell number	Number of living cells	Number of dead cells	The average diameter	Average roundness	Clumping rate	Dilution ratio	Measure time	Cell type
VC-A-1-72H	user	53700	54080	99.29	380	41	40	1	17.78	0.81	4.29	Original concentration	44095.8	Std_Size
VC-A-2-72H	user	56200	58000	96.88	1800	44	42	2	17.77	0.81	16.25	Original concentration	44095.8	Std_Size
VC-A-3-72H	user	50000	5000	100	0	40	40	0	17.79	0.82	2.98	Original concentration	44095.8	Std_Size
OE-A-1-72H	user	39000	39400	98.9	400	34	33	1	19.94	0.76	4.4	Original concentration	44095.8	Std_Size
OE-A-2-72H	user	47700	47700	100	0	37	37	0	19.78	0.76	7.27	Original concentration	44095.8	Std_Size
OE-A-3-72H	user	43200	43200	100	0	36	36	0	19.67	0.76	10.76	Original concentration	44095.8	Std_Size
SH-A-1-72H	user	59700	59700	100	0	43	43	0	17.72	0.83	3.23	Original concentration	44095.8	Std_Size
SH-A-2-72H	user	62300	62780	99.24	433	44	44	0	18.16	0.83	6.06	Original concentration	44095.8	Std_Size
SH-A-3-72H	user	65000	65950	98.56	950	52	51	1	19.12	0.79	9.09	Original concentration	44096.8	Std_Size
VC-H-1-72H	user	59700	60190	99.18	490	44	43	1	21.69	0.73	11.48	Original concentration	44095.8	Std_Size
VC-H-2-72H	user	54500	54770	99.5	270	42	41	1	22.14	0.74	5	Original concentration	44095.8	Std_Size
VC-H-3-72H	user	53900	53900	100	0	42	42	0	22.78	0.79	7.3	Original concentration	44095.8	Std_Size
OE-H-1-72H	user	49100	50210	97.79	0	38	37	1	20.11	0.79	8.29	Original concentration	44095.8	Std_Size
OE-H-2-72H	user	39700	39700	100	0	35	35	0	20.07	0.78	10.57	Original concentration	44095.8	Std_Size
OE-H-3-72H	user	43000	43000	100	0	36	36	0	20.98	0.87	9	Original concentration	44095.8	Std_Size
SH-H-1-72H	user	72400	73340	98.72	940	64	63	1	21.05	0.77	5.13	Original concentration	44095.8	Std_Size
SH-H-2-72H	user	76200	76200	100	0	64	64	0	21.4	0.74	1.52	Original concentration	44095.8	Std_Size
SH-H-3-72H	user	65600	66250	99.02	650	52	51	0	22.09	0.84	9.7	Original concentration	44095.8	Std_Size
Attention :VC-A is Ctrl,A549
OE-A is OE A549
SH-A is KD A549
VC-H is Ctrl H1299
OE-H is OE h1299
