# Supplementary material for: Inhibition of Kelch-like epichlorohydrin-related protein 1 promotes the progression and drug resistance of lung adenocarcinoma
Source: PeerJ journal article supplement (doi:10.7717/peerj.11908), 2021-08-19
Supplement: Figure3_raw_data.zip [file 20200922Growth curve-96h.xls]

## Sheet: Sheet1
Sample ID	UserID	Viable cell concentration	Total cell concentration	Cell viability	Dead cell concentration	Total cell number	Number of living cells	Number of dead cells	The average diameter	Average roundness	Clumping rate	Dilution ratio	Measure time	Cell type
vc-a-1	user	91000	92950	97.9	1950	67	65	1	19.37	0.75	28.67	Original concentration	44096.8	Std_Size
vc-a-2	user	86700	87290	99.32	590	67	66	1	19.69	0.75	19.11	Original concentration	44096.8	Std_Size
vc-a-3	user	84900	84900	100	0	67	67	0	19.91	0.74	20.11	Original concentration	44096.8	Std_Size
OE-a-1	user	66300	66300	100	0	52	52	0	21.19	0.73	1.52	Original concentration	44096.8	Std_Size
OE-a-2	user	60800	62880	96.69	2080	44	42	2	21.62	0.69	2.21	Original concentration	44096.8	Std_Size
OE-a-3	user	70200	71870	97.67	1670	64	63	1	21.56	0.87	3.45	Original concentration	44096.8	Std_Size
SH-a-1	user	114000	115740	98.49	1740	85	84	1	20.11	0.72	5.03	Original concentration	44096.8	Std_Size
SH-a-2	user	106000	107590	98.52	1300	85	84	1	21.57	0.68	1.48	Original concentration	44096.8	Std_Size
SH-a-3	user	111000	111000	100	0	85	85	0	21.23	0.71	9.78	Original concentration	44096.8	Std_Size
SH-H-1	user	128000	129530	98.82	1530	86	85	1	22.58	0.7	7.87	Original concentration	44096.8	Std_Size
SH-H-2	user	136500	138630	98.46	2130	86	85	1	23.09	0.7	4.62	Original concentration	44096.8	Std_Size
SH-H-3	user	129000	129000	100	0	86	86	0	25.87	0.7	4.78	Original concentration	44096.8	Std_Size
VC-H-1	user	106700	106950	99.76	250	85	84	1	22.47	0.69	5.45	Original concentration	44096.8	Std_Size
VC-H-2	user	95700	95980	99.71	280	84	84	0	22.76	0.69	12	Original concentration	44096.8	Std_Size
VC-H-3	user	97500	97500	100	0	84	84	0	22.23	0.67	17.2	Original concentration	44096.8	Std_Size
OE-H-1	user	74600	74600	100	0	66	66	0	21.42	0.7	5.3	Original concentration	44096.8	Std_Size
OE-H-2	user	79500	80710	98.5	1300	67	66	1	21.19	0.7	2.33	Original concentration	44096.8	Std_Size
OE-H-3	user	72000	72000	100	0	66	66	0	21.45	0.6	9.8	Original concentration	44096.8	Std_Size
Attention :VC-A is Ctrl,A549
OE-A is OE A549
SH-A is KD A549
VC-H is Ctrl,H1299
OE-H is OE h1299
