# Supplementary material for: Inhibition of Kelch-like epichlorohydrin-related protein 1 promotes the progression and drug resistance of lung adenocarcinoma
Source: PeerJ. 2021 Aug 19;9:e11908. doi: 10.7717/peerj.11908 (PMC8380428; doi:10.7717/peerj.11908)
Supplement: Supplemental Information 1 [file peerj-09-11908-s001.xlsx]

## Sheet: Sheet1
N	Gender	Age (years)	Smoking	Tumor max diameter(cm)	淋巴结检查数目	Lymph node metastasis	Tumour site	Stage	Differentiation	Keap1 expression in LUAD	Fromowitz score in LUAD	Keap1 expression in para-cancerous	Fromowitz score in para-cancerous
1	Female	63	No	6	8	Yes	Right	III	Low	Low	0	Low	1
2	Male	64	No	3	2	Yes	Left	III	Low	Low	2	Low	3
3	Female	56	No	1.5	5	No	Right	I	High	Low	3	High	5
4	Male	77	No	1.6	2	No	Left	I	High	Low	2	Low	2
5	Male	61	Yes	5	12	Yes	Right	II	Moderate	Low	1	Low	1
6	Male	51	No	3	13	Yes	Left	II	Moderate	Low	1	Low	0
7	Female	63	No	6	2	No	Right	II	Moderate	High	5	High	4
8	Female	66	No	4	10	No	Right	I	Moderate	Low	1	Low	3
9	Female	72	Yes	8	10	No	Left	III	Moderate	Low	0	Low	2
10	Female	50	No	5	28	Yes	Right	III	Moderate	Low	1	Low	1
11	Male	62	Yes	2	9	No	Left	I	Moderate	High	6	High	7
12	Male	66	No	2	14	No	Right	I	Moderate	Low	3	Low	2
13	Male	60	Yes	3	6	No	Left	II	Moderate	Low	3	Low	3
14	Male	71	No	1	17	Yes	Right	III	Low	Low	2	Low	3
15	Male	54	Yes	3	5	Yes	Right	II	Moderate	Low	2	High	5
16	Female	67	No	3	11	No	Right	I	Moderate	Low	2	High	6
17	Male	63	No	3	14	No	Right	III	High	Low	3	High	4
18	Male	73	Yes	4	2	Yes	Left	III	Moderate	Low	2	High	7
19	Male	60	No	4	2	No	Right	I	Low	High	7	High	7
20	Male	56	Yes	6	19	No	Left	II	High	Low	1	High	5
21	Male	75	No	2	8	No	Right	I	High	High	6	High	6
22	Female	58	No	1.5	7	No	Right	I	High	High	4	High	5
23	Male	66	Yes	2	10	No	Right	I	High	High	7	High	7
24	Female	62	No	4	12	Yes	Right	III	Moderate	High	4	High	4
25	Male	51	Yes	2	2	No	Right	I	Moderate	High	6	High	7
26	Female	73	No	1.5	14	No	Left	I	High	High	5	High	5
27	Female	61	No	3	9	Yes	Left	II	Moderate	High	7	High	6
28	Female	61	No	1	11	No	Right	I	High	High	6	High	6
29	Female	50	No	1.5	5	No	Left	I	High	High	7	High	6
30	Male	76	No	3	6	No	Right	II	Moderate	High	7	High	7
31	Female	63	No	7		No	Left	I	Moderate	High	6	High	7
32	Male	67	Yes	4		Yes	Right	II	High	Low	1	High	4
33	Female	70	Yes	3		Yes	Right	II	High	Low	3	High	5
34	Female	55	No	6		Yes	Left	II	Low	Low	1	Low	1
35	Male	65	No	4		Yes	Left	II	Moderate	Low	2	High	6
36	Female	64	No	5		Yes	Right	III	Moderate	Low	1	High	7
37	Female	58	Yes	7		Yes	Left	III	High	Low	3	High	4
